# Supplementary material for: Population Dynamics and Habitat Preferences of Waterbirds across Six Wetlands at Different Geographical Scales
Source: Research Square preprint supplement (doi:10.21203/rs.3.rs-4640895/v1), 2024-07-22
Supplement: Supplementary file 1 [file b2d70ccba7f1882c26e8605b.docx]

| **List Of the Waterbirds** | | | |
| --- | --- | --- | --- |
| **Order/Family /Common Name** | **Scientific Name** | **Residency/Feeding Guilds** | **Feeding Guilds** |
| [**Accipitriformes**](https://www.google.com.hk/search?newwindow=1&biw=1482&bih=746&hotel_occupancy=2&sxsrf=APwXEdfxMtDCB3omotGS4MA-LxB7sJaWDw:1686654812856&q=Accipitriformes&stick=H4sIAAAAAAAAAONgVuLUz9U3MEwxMylYxMrvmJycWZBZUpSZll-Um1oMAF6-UJgfAAAA&sa=X&ved=2ahUKEwjFgurnjsD_AhXNDkQIHaQDDewQmxMoAHoECBkQAg) |  |  |  |
| **Accipitridae** |  |  |  |
| Pallas Fish Eagle P | *Haliaeetus leucoryphus EN* | Residential | Piscivore/Carnivore |
| [**Anseriformes**](https://www.google.com.hk/search?newwindow=1&sxsrf=APwXEdcfv52dM89E7AVhe5SxCmRiDIX0MQ:1685071114798&q=Anseriformes&stick=H4sIAAAAAAAAAONgVuLUz9U3MEyONyxbxMrjmFecWpSZll-Um1oMAE_5apQcAAAA&sa=X&ved=2ahUKEwj52d-Jg5L_AhVUPkQIHSQjCFEQmxMoAHoECH0QAg) |  |  |  |
| **Anatidae** |  |  |  |
| Bar-headed goose P | *Anser indicus LC* | Migratory | Omnivore |
| Common Pochard P | *Aythya ferina LC* | Migratory | Omnivore |
| Common shelduck P | *Tadornatadorna LC* | Migratory | Omnivore |
| Eurasian Teal P | *Anas crecca LC* | Migratory | Omnivore |
| Eurasian wigeon P | *Marecapenelope LC* | Migratory | Omnivore |
| Ferruginous duck P | *Aythya nyroca LC* | Migratory | Omnivore |
| Gadwall P | *Mareca strepera LC* | Migratory | Omnivore |
| Garganey P | *Anas querquedula LC* | Migratory | Omnivore |
| Greylag goose P | *Anseranser LC* | Migratory | Omnivore |
| Mallard P | *Anas platyrhynchos LC* | Migratory | Omnivore |
| Northern pintail P | *Anas acuta LC* | Migratory | Omnivore |
| Northern Shoveler P | *Spatula clypeata LC* | Migratory | Omnivore |
| Red crested Pochard P | *Netta rufina LC* | Migratory | Omnivore |
| Ruddy shelduck P | *Tadornaferruginea LC* | Migratory | Omnivore |
| Spot-billed duck P | *Anas poecilorhyncha LC* | Migratory | Omnivore |
| Tufted duck P | *Aythya fuligula LC* | Migratory | Omnivore |
| **Charadriiformes** |  |  |  |
| **Charadriidae** |  |  |  |
| Little ringed plover O | *Charadrius dubius LC* | Residential | Insectivore/Carnivore |
| Northern lapwing P | *Vanellusvanellus NT* | Residential | Insectivore/Carnivore |
| Red-wattled lapwing P | *Vanellus indicus LC* | Residential | Insectivore/Carnivore |
| Large sand plover P | *Charadrius leschenaultii LC* | Residential | Insectivore/Carnivore |
| White-tailed Lapwing P | *Vanellusleucurus LC* | Residential | Insectivore/Carnivore |
| Yellow-Wattled lapwing | *Vanellusmalabaricus LC* | Residential | Insectivore/Carnivore |
| **Jacanidae** |  |  |  |
| Pheasant tail Jacana P | *Hydrophasianuschirurgus LC* | Residential | Insectivore/Carnivore |
| **Laridae** |  |  |  |
| Black-headed gull P | *Chroicocephalus ridibundus LC* | Migratory | Insectivore/Carnivore |
| Brownhead gull P | *Chroicocephalusbrunnicephalus LC* | Migratory | Insectivore/Carnivore |
| Great Black-headed gull P | *Ichthyaetusichthyaetus LC* | Migratory | Insectivore/Carnivore |
| Herring gull P | *Larus argentatus LC* | Migratory | Insectivore/Carnivore |
| Black bellied Tern O | *Sterna acuticaudaEN* | Migratory | Insectivore/Piscivore |
| Common Tern*C* | *Sterna hirundo LC* | Residential | Insectivore/Piscivore |
| Slender-billed gull*C* | *Chroicocephalusgenei LC* | Migratory | Piscivore |
| Indian River tern P | *Sterna aurantia NT* | Residential | Insectivore/Carnivore |
| **Recurvirostridae** |  |  |  |
| Avocet C | *Recurvirostra LC* | Residential | Insectivore/Carnivore |
| Black-winged stilt C | *Himantopus himantopus LC* | Residential | Insectivore/Carnivore |
| **Scolopacidae** |  |  |  |
| Black-tailed Godwit C | *Limosalimosa NT* | Migratory | Piscivore/Insectivore/Carnivore |
| Common sandpiper P | *Actitis hypoleucos LC* | Migratory | Piscivore/Insectivore/Carnivore |
| Great Snipe P | *Gallinago media NT* | Migratory | Insectivore/Carnivore |
| Green shank P | *Tringa nebularia LC* | Migratory | Piscivore/Insectivore/Carnivore |
| Little stint P | *Calidris minuta LC* | Migratory | Piscivore/Insectivore/Carnivore |
| Redshank P | *Tringa totanus LC* | Migratory | Piscivore/Insectivore/Carnivore |
| **Ciconiiformes** |  |  |  |
| **Ciconiidae** |  |  |  |
| White stork P | *Ciconia ciconia LC* | Migratory | Insectivore |
| Wooly Necked Stork O | *Ciconia episcopus VA* | Migratory | Insectivore |
| [**Coraciiformes**](https://www.google.com.hk/search?newwindow=1&biw=1482&bih=746&hotel_occupancy=2&sxsrf=APwXEdcZHylZS7wE3u65445omZ9dPwCIrw:1686654833922&q=Coraciiformes&stick=H4sIAAAAAAAAAONgVuLUz9U3MEwpNClcxMrrnF-UmJyZmZZflJtaDAAgwsIsHQAAAA&sa=X&ved=2ahUKEwjb8e_xjsD_AhUdPEQIHZa0BEQQmxMoAHoECBsQAg) |  |  |  |
| **Alcedinidae** |  |  |  |
| Common Kingfisher C | *Alcedo atthis LC* | Residential | Piscivore/Insectivore/Carnivore |
| Pied Kingfisher C | *Cerylerudis LC* | Residential | Piscivore/Insectivore/Carnivore |
| White-throated Kingfisher O | *Halcyon smyrnensis LC* | Residential | Piscivore/Insectivore/Carnivore |
| [**Gruiformes**](https://www.google.com.hk/search?newwindow=1&sxsrf=APwXEdd-7KUuZ8mOW-ZJPYs-yg9vcbT8pQ:1685071202285&q=Gruiformes&stick=H4sIAAAAAAAAAONgVuLUz9U3MEw2yS5axMrlXlSamZZflJtaDADrauR1GgAAAA&sa=X&ved=2ahUKEwjAwLuzg5L_AhVdO0QIHUT-AHoQmxMoAHoECCcQAg) |  |  |  |
| **Gruidae** |  |  |  |
| Common crane P | *Grus grus LC* | Migratory | Insectivore/Carnivore |
| Demoiselle crane P | *Grus virgo LC* | Migratory | Insectivore/Carnivore |
| **Rallidae** |  |  |  |
| Little Crake P | *Porzana parva LC* | Residential | Omnivore |
| White-breasted Waterhen C | *Amaurornisphoenicurus LC* | Migratory | Omnivore |
| Common Moorhen C | *Gallinula chloropus LC* | Residential | Omnivore |
| Purple swamphen C | *Porphyrioporphyrio LC* | Residential | Omnivore |
| Watercock P | *Gallicrex cinerea LC* | Residential | Omnivore |
| Common coot P | *Fulicaatra LC* | Migratory | Omnivore |
| **Passeriformes** |  |  |  |
| **Motacillidae** |  |  |  |
| White Wagtail P | *Motacilla alba LC* | Migratory | Insectivore |
| **Pelecaniformes** |  |  |  |
| **Ardeidae** |  |  |  |
| Cattle egret C | *Bubulcus ibis LC* | Residential | Piscivore/Insectivore/Carnivore |
| Great egret C | *Ardea alba LC* | Residential | Piscivore/Insectivore/Carnivore |
| Grey heron O | *Ardea cinerea LC* | Residential | Piscivore/Insectivore/Carnivore |
| Indian pond heron O | *Ardeolagrayii LC* | Residential | Piscivore/Insectivore/Carnivore |
| Intermediate egret O | *Ardea intermedia LC* | Residential | Piscivore/Insectivore/Carnivore |
| Little egret O | *Egrettagarzetta LC* | Residential | Piscivore/Insectivore/Carnivore |
| Purple heron P | *Ardea purpurea LC* | Residential | Piscivore/Insectivore/Carnivore |
| **Pelecanidae** |  |  |  |
| Dalmatian Pelican P | *Pelecanus crispus VA* | Migratory | Piscivore/Carnivore |
| Great White Pelicans C | *Pelecanusonocrotalus LC* | Migratory | Piscivore |
| **Threskiornithidae** |  |  |  |
| Eurasian Spoon bill P | *Platalealeucorodia LC* | Migratory | Piscivore/Insectivore/Carnivore |
| Glossy Ibis C | *Plegadisfalcinellus LC* | Migratory | Piscivore/Insectivore/Carnivore |
| **Phoenicopteriformes** |  |  |  |
| **Phoenicopteridae** |  |  |  |
| Greater/Red Flamingo C | *Phoenicopterus roseus LC* | Migratory | Omnivore |
| Lesser Flamingo O | *Phoeniconaias minor NT* | Migratory | Omnivore |
| **Podicipediformes** |  |  |  |
| **Podicipedidae** |  |  |  |
| Black necked grebe C | *Podiceps nigricollis LC* | Migratory | Piscivore |
| Great crested grebe O | *Podiceps cristatus LC* | Migratory | Piscivore |
| Little grebe C | *Tachybaptus ruficollis LC* | Migratory | Piscivore |
| [**Suliformes**](https://www.google.com.hk/search?newwindow=1&biw=1482&bih=746&hotel_occupancy=2&sxsrf=APwXEdck4wtYojV2ar-Qqpv-fti8Lmn7Kg:1686655037584&q=Suliformes&stick=H4sIAAAAAAAAAONgVuLSz9U3SK-sSDErWcTKFVyak5mWX5SbWgwASvMSaxsAAAA&sa=X&ved=2ahUKEwjBtP7Sj8D_AhUDM0QIHckbDWoQmxMoAHoECB4QAg) |  |  |  |
| **Anhingidae** |  |  |  |
| Oriental Darter O | *Anhinga melanogaster NT* | Migratory | Piscivore/Insectivore/Carnivore |
| **Phalacrocoracidae** |  |  |  |
| Little cormorant O | *Microcarboniger LC* | Residential | Piscivore/Insectivore/Carnivore |
| Great cormorant C | *Phalacrocorax carbo DD* | Residential | Piscivore/Insectivore/Carnivore |

**Table 2:** Waterbird population parameters among six potential wetland habitats

| **Name of Wetland habitat** | **Total No. of Species** | **Total Detection and Relative Abundance (%)** | | **Species Diversity (Shannon’s Index; H')** | **Population trend (λ)** | **Species Richness (Margalef’s Index; R)** | **Species Dispersion (Pielou J index; E)** |
| --- | --- | --- | --- | --- | --- | --- | --- |
| Chashma wetland | 52 | 48767 | 23.423% | 3.637 | 0.0321 | 4.724 | 0.848 |
| Dhap Chapak wetland | 35 | 35552 | 17.076% | 3.318 | 0.0405 | 3.245 | 0.773 |
| Taunsa wetland | 50 | 55406 | 26.612% | 3.740 | 0.027 | 4.486 | 0.872 |
| Uchali wetland | 32 | 45095 | 21.659% | 3.288 | 0.043 | 2.893 | 0.766 |
| Haliji wetland | 47 | 14671 | 7.046% | 3.558 | 0.034 | 4.797 | 0.829 |
| Raja wetland | 37 | 8711 | 4.184% | 3.448 | 0.034 | 3.978 | 0.804 |
| Overall | 73 | 208,202 |  | 3.710 ± 0.097 | 0.031 | 5.88 ± 0.530 | 0.865± 0.023 |

**Table 3:** Year–wise waterbird diversity indices during five consequent migratory seasons

| **Year** | **Total No. of Species** | **Total Detection (N)** | **Shannon diversity index (H')** | **Population trend (**λ**)** | **Species Dispersion (E)** |
| --- | --- | --- | --- | --- | --- |
| **2017-18** | 69 | 41560 | 3.7077 | 0.0309 | 0.8757 |
| **2018-19** | 69 | 40052 | 3.7005 | 0.0317 | 0.8740 |
| **2019-20** | 69 | 45166 | 3.6856 | 0.0317 | 0.8704 |
| **2020-21** | 73 | 40831 | 3.7380 | 0.0304 | 0.8712 |
| **2021-22** | 73 | 40593 | 3.7192 | 0.0309 | 0.8669 |
| **Overall** | 73 | 208202 | 3.7141 | 0.0311 | 0.8657 |

**Table 4:** Year–wise and habitat–wise waterbird diversity indices during five consequent migrant seasons

| **Location** | **Year** | **Total No. of Species** | **Total Detection (N)** | **Shannon diversity index (H')** | **Population trend (**λ**)** | **Species dispersion (E)** |
| --- | --- | --- | --- | --- | --- | --- |
| **Chashma** | 2017-18 | 47 | 9728 | 3.6272 | 0.0319 | 0.9421 |
|  | 2018-19 | 47 | 9335 | 3.6034 | 0.0331 | 0.9359 |
|  | 2019-20 | 47 | 10687 | 3.6134 | 0.0322 | 0.9385 |
|  | 2020-21 | 52 | 9526 | 3.6591 | 0.0317 | 0.9261 |
|  | 2021-22 | 52 | 9491 | 3.6459 | 0.0320 | 0.9227 |
| **Dhap Chapak** | 2017-18 | 31 | 6845 | 3.3059 | 0.0404 | 0.9627 |
|  | 2018-19 | 31 | 7072 | 3.2882 | 0.0416 | 0.9575 |
|  | 2019-20 | 31 | 8332 | 3.3042 | 0.0411 | 0.9622 |
|  | 2020-21 | 35 | 6646 | 3.3304 | 0.0402 | 0.9367 |
|  | 2021-22 | 35 | 6657 | 3.3311 | 0.0402 | 0.9369 |
| **Taunsa** | 2017-18 | 48 | 11452 | 3.7385 | 0.0267 | 0.9657 |
|  | 2018-19 | 48 | 10215 | 3.7292 | 0.0275 | 0.9633 |
|  | 2019-20 | 48 | 11663 | 3.7109 | 0.0280 | 0.9586 |
|  | 2020-21 | 50 | 10955 | 3.7492 | 0.0268 | 0.9584 |
|  | 2021-22 | 50 | 11121 | 3.7470 | 0.0267 | 0.9578 |
| **Uchali** | 2017-18 | 31 | 8861 | 3.2601 | 0.0438 | 0.9494 |
|  | 2018-19 | 31 | 8836 | 3.2737 | 0.0433 | 0.9533 |
|  | 2019-20 | 31 | 9797 | 3.2861 | 0.0419 | 0.9569 |
|  | 2020-21 | 32 | 8984 | 3.2861 | 0.0425 | 0.9482 |
|  | 2021-22 | 31 | 8617 | 3.2494 | 0.0442 | 0.9462 |
| **Haleji** | 2017-18 | 47 | 2940 | 3.5359 | 0.0358 | 0.9184 |
|  | 2018-19 | 47 | 2901 | 3.5722 | 0.0343 | 0.9278 |
|  | 2019-20 | 47 | 2925 | 3.5796 | 0.0338 | 0.9297 |
|  | 2020-21 | 47 | 2961 | 3.5729 | 0.0341 | 0.9280 |
|  | 2021-22 | 47 | 2944 | 3.5523 | 0.0351 | 0.9226 |
| **Raja** | 2017-18 | 37 | 1734 | 3.4602 | 0.0342 | 0.9583 |
|  | 2018-19 | 37 | 1693 | 3.4709 | 0.0337 | 0.9612 |
|  | 2019-20 | 37 | 1762 | 3.4816 | 0.0331 | 0.9642 |
|  | 2020-21 | 37 | 1759 | 3.4779 | 0.0334 | 0.9632 |
|  | 2021-22 | 37 | 1763 | 3.4767 | 0.0335 | 0.9628 |

**Appendix 1: Descriptions of each wetland habitat type.**

| **Description** | **Name of wetland habitats** | | | | | |
| --- | --- | --- | --- | --- | --- | --- |
| **Chashma** | **Dhapchapak** | **Taunsa** | **Uchali** | **Haleji** | **Raja** |
| Latitude | N; 32° 26' 54.79" | N; 310 44' 15" | N; 30° 32' 20.78" | N; 32° 33' 16.54" | 24°48' 41.90" | 27°39' 42.30" |
| Longitude | E; 71° 26' 21.64" | E; 70.9° 41' 12" | E; 70° 49' 35.51" | E; 72° 1' 9.28" | 67°47' 15.62" | 68°36' 0.47" |
| Area (ha) | 4099 ha | 2562 ha | 6567 ha | 1943 ha | 1660 ha | 175 ha |
| Landscape | Reservoir, riverine forest, shrublands, agriculture fields, and grasslands | Reservoirs, floodplains, semideserts, and agriculture fields | Reservior, alluval plans, adjacent fields, and grasslands | Reservoirs, reedbeds, marsh swamps, mountains, scrub forest, and salt ranges | Reservoirs, islands, reedbeds, rocky plains, and waterlogged areas | Reservoir, scrubby vegetation, reedbeds, and agricultural fields |
| Hydrologic Characteristics |  |  |  |  |  |  |
| Water Temperature (ºC) | 14.6 – 16.3 | 21.5 – 24.68 | 23.2 – 25.6 | 20.8 **–** 25.8 | 28.6–38.8 | 25.2 – 30.36 |
| Salinity (g/L) | 0.18– 0.21 | 0.20 – 0.24 | 0.14 – 0.26 | 0.19 – 22 | 0.22 – 0.27 | 0.18 – 0.24 |
| pH | 8.2 – 9.95 | 7.9 – 8.9 | 8.7 – 9.5 | 8.4 **–** 9.12 | 7.71 – 8.75 | 8.2 – 9.5 |
| TDS (mg/L) | 185 – 330 | 220 – 340 | 280 – 620 | 155 – 286 | 256 – 548 | 230 – 420 |
| Dissolved oxygen (mg/L) | 7.2 – 8.9 | 7.4 – 8.2 | 7.4 – 8.6 | 7.8 – 9.6 | 7.5 – 9.1 | 7.7 – 9.8 |
| Color | Greenish muddy | Greenish | Greenish muddy | Bluish light green | Yellowish green | Light green |
| Most Dominant Tree Species | *P. cineraria, P. glandulosa, A. modesta, Vachellia nilotica, Slavadora oleoides* | *V. nilotica, Olea ferruginea, Z. mauritiana, T. aphylla, A. modesta,* | *Populus euphratica, Acacia modesta, A. nilotica, P. cineraea, T. aphylla, Salsola baryosama* | *Acacia modesta, A. nilotica, Prosopis cineria, Tamarix aphylla, Zizyphus mauritiana, Dalbergea sissoo* | *Vachella nilotica, Ziziphus mauritiana, Tamarix aphylla* | *Vachellia nilotica, Prosopis cinerea, Prosopis juliflra, Cordia dichotoma, Saccharum munja* |
| Most Dominant Shrub Species | *Z. nummularia, T. dioica, Cocculus laeba, Saccharum bengalense, N. nucifera* | *Withania coagulans, R. buxifolia, Rhazya stricta, S. bengalense, D. viscoa,* | *Zizyphus nummularia, Suaeda fruticosa, Tamariax dioica, S. bengalense* | *Ehretia laenis, Gymnosporia royleana, Reptonia buxifolia, Dodonea viscoa, Saccharum bengalense, Nelumbo nucifera* | *Cocculus laeba, Rhazya stricta, D. viscoa, S. bengalense, Nelumbo nucifera* | *Suaeda fruticosa, Rhazya stricta, Gymnosporia royleana, Saccharum bengalense, R. buxifolia,* |
| Most Dominant Aquatic Vegetation | *Hydrilla verticillata, T. domingensis, Phragmites australis, P. crispus, Nymphoides cristatum, Vallisneria spiralis, Zannichellia palustris, Ranunculus aquatilis, Arundo donax, C. rotundus* | *T. angustata, Phragmites karka, Hydrilla verticillata, P. pectinatus, Fimbristylis dichotoma, P. pectinatans, A. donax, C. rotundus* | *Cyperus difformis, Phragmites karka, A. donax, Eleocharis melanocarpa, Schoenoplectus litoralis, Zannichellia palustris, Cyperus rotundus, Sporobolus arabicus* | *Carex fedia, Hydrilla verticillata, Juncus sp., Phragmites australis, Potamogeton pectinatus, Ranunculus sceleratus, Typha augusta, Scirpus sp., Arundo donax, Cyperus rotundus, Sporobolus arabicus* | *Typha latifolia, Arundo donax, Juncus effuses, Ceratophyllum demersum, Phragmites australis, Echinochloa colona, Lycopus asper, Sagittaria latifolia* | *Potamogeton spirillus, Myriophyllum spicatum, Ceratophyllum demersum, Vallisneria sp, Cyperus spp, Eleocharis palustris, Dulichium spp, Juncus tenuis, Scirpus flviatilis, Typha angustifolia, Cinna latifolia, Panicum virgatum, Setaria glauca, Phragmites australis* |
| Most Common Grasses | *Chrysopogon serrulatus, Cymbopogon jwarancusa, Digitaria adscendens, Aristida adscensionis, Alopecurus aequalis, C. aucheri, C. setigerus, E. ciliaris* | *S. spontaneum, C. setigerus, C. pennisetiformis, Sporobolus arabicus, Heteropogon contortus, P. antidotale, C. setigerus, C. dactylon, E. ciliaris* | *Saccharum spontaneum, Eleusine compressa, Panicum antidotale, Boerhavia diffusa, Fagonia ovalifolia, Imperata cylindrical, E. ciliaris, Rumex sp., Cenchrus setigerus,* | *Phyla nodiflora, Hydrilla verticillata, Paspalum distichum, Lasiurus hirsutus. Dichanthium annulatum, Aeluropus lagopoides, Zannichellia palustris, Cenchrus setigerus, Eragrostis ciliaris* | *Digitaria adscendens, Heteropogon contortus, Fagonia ovalifolia, Aeluropus lagopoides, Aeluropus lagopoides, , E. ciliaris* | *C.setigerus, P.antidotale, Fagonia ovalifolia, Imperata cylindrical, Phyla nodiflora, Digitaria adscendens, Saccharum spontaneum* |
| Rainfall | 300–500mm | 2 – 260mm | 200– 450 mm | 300– 800 mm | 250-450 mm | 148 mm |
| Relative Humidity | 22.0 – 85.0%. | 20.0 – 82.0%. | 25.0 – 85.0% | 22.0 – 85.0% | 37-85.0% | 37-85.0% |
| Temperature | 4.5– 41°C | 6– 46 °C | 4.5 – 45 °C | 0.5 – 36 °C | 2.2 ◦C - 48.5◦C | 7.0 ◦C - 44.4◦C |

Appendix 2: List of the waterbird species in each wetland habitat

| **Family** | **Scientific Name** | **Common Name** | **Foraging Guild** | **IUCN Status** | **Wetland Habitats** | | | | | | **Total** |
| --- | --- | --- | --- | --- | --- | --- | --- | --- | --- | --- | --- |
| **Chashma** | **Dhap Chapak** | **Taunsa** | **Uchali** | **Haleji** | **Raja** |
| Accipitridae | *Haliaeetus leucoryphus* | Pallas Fish Eagle | P | EN | 0 | 0 | 0 | 0 | 0.028 | 0.010 | 0.038 |
| Alcedinidae | *Alcedo atthis* | Common kingfisher | I/P | LC | 0 | 0 | 0 | 0 | 0.020 | 0 | 0.020 |
| Alcedinidae | *Ceryle rudis* | Pied kingfisher | I/P/C | LC | 0 | 0 | 0 | 0 | 0.072 | 0.082 | 0.154 |
| Alcedinidae | *Halcyon smyrnensis* | White-throated kingfisher | I/P/C | LC | 0 | 0 | 0 | 0 | 0.188 | 0.080 | 0.268 |
| Anatidae | *Anas poecilorhyncha* | Spot billed duck | O | LC | 0.314 | 0 | 0.479 | 0 | 0 | 0 | 0.794 |
| Anatidae | *Anser indicus* | Bar-headed goose | O | LC | 0.424 | 0.372 | 0.430 | 0.506 | 0.293 | 0 | 2.026 |
| Anatidae | *Aythya ferina* | Common pochard | O | VU | 0.856 | 0.789 | 0.914 | 0 | 0.322 | 0.094 | 2.975 |
| Anatidae | *Tadorna tadorna* | Common shelduck | O | LC | 0.421 | 0.389 | 0.469 | 0.495 | 0 | 0 | 1.775 |
| Anatidae | *Anas crecca* | Eurasian spoonbill | I/P | LC | 0.062 | 0 | 0.054 | 0 | 0.045 | 0 | 0.162 |
| Anatidae | *Mareca penelope* | Eurasian teal | I/P | LC | 0.809 | 0.751 | 0.769 | 0.891 | 0.446 | 0.227 | 3.893 |
| Anatidae | *Aythya nyroca* | Ferruginous duck | O | NT | 0.328 | 0.344 | 0.328 | 0.382 | 0.276 | 0 | 1.658 |
| Anatidae | *Mareca strepera* | Gadwall | O | LC | 1.406 | 1.044 | 1.404 | 1.626 | 0.319 | 0.169 | 5.969 |
| Anatidae | *Anas querquedula* | Garganey | O | LC | 0 | 0 | 0 | 0 | 0.251 | 0.126 | 0.378 |
| Anatidae | *Anser anser* | Greylag goose | O | LC | 0.272 | 0 | 0.335 | 0 | 0 | 0 | 0.606 |
| Anatidae | *Anas platyrhynchos* | Mallard | O | LC | 0.672 | 0.639 | 0.621 | 0.720 | 0.566 | 0.179 | 3.397 |
| Anatidae | *Anas acuta* | Northern pintail | O | NT | 0.976 | 0.843 | 0.945 | 1.062 | 0.374 | 0.1476 | 4.348 |
| Anatidae | *Spatula clypeata* | Northern shoveler | O | NT | 0.393 | 0.355 | 0.339 | 0.436 | 0.168 | 0.254 | 1.947 |
| Anatidae | *Netta rufina* | Red-crested pochard | O | LC | 0.224 | 0 | 0.352 | 0 | 0 | 0 | 0.576 |
| Anatidae | *Tadorna ferruginea* | Ruddy shelduck | O | LC | 0.292 | 0.273 | 0.349 | 0 | 0 | 0 | 0.913 |
| Anatidae | *Aythya fuligula* | Tufted duck | O | NT | 0.199 | 0 | 0.310 | 0 | 0 | 0 | 0.508 |
| Anhingidae | *Anhinga melanogaster* | Oriental darter | P | NT | 0 | 0 | 0 | 0 | 0.0889 | 0.075 | 0.164 |
| Ardeidae | *Bubulcus ibis* | Cattle egret | I/P/C | LC | 0.922 | 0.792 | 0.828 | 1.028 | 0.101 | 0.008 | 3.678 |
| Ardeidae | *Ardea alba* | Great egret | I/P/C | LC | 1.122 | 0.954 | 1.016 | 1.218 | 0.035 | 0.128 | 4.473 |
| Ardeidae | *Ardea cinerea* | Grey heron | I/P/C | LC | 0.389 | 0.316 | 0.376 | 0.447 | 0.150 | 0.081 | 1.759 |
| Ardeidae | *Ardeola grayii* | Indian pond heron | I/P/C | LC | 0.689 | 0.601 | 0.653 | 0.779 | 0.118 | 0.111 | 2.950 |
| Ardeidae | *Ardea intermedia* | Intermediate egret | I/P/C | LC | 0.801 | 0.738 | 0.783 | 0.885 | 0.174 | 0.087 | 3.467 |
| Ardeidae | *Egretta garzetta* | Little egret | I/P/C | LC | 0.337 | 0.314 | 0.341 | 0.388 | 0.083 | 0.061 | 1.523 |
| Ardeidae | *Ardea purpurea* | Purple heron | I/P/C | LC | 0.271 | 0.264 | 0.333 | 0.316 | 0.112 | 0.064 | 1.359 |
| Charadriidae | *Charadrius leschenaultii* | Greater sand plover | I/P/C | LC | 0 | 0 | 0 | 0 | 0.015 | 0 | 0.015 |
| Charadriidae | *Calidris minuta* | Little stint | I | LC | 0.566 | 0.481 | 0.653 | 0.702 | 0.208 | 0.163 | 2.773 |
| Charadriidae | *Charadrius dubius* | Little-ringed plover | I/P/C | LC | 0.355 | 0.314 | 0.416 | 0.418 | 0 | 0 | 1.504 |
| Charadriidae | *Vanellus vanellus* | Northern lapwing | I/P/C | NT | 0.208 | 0 | 0.342 | 0 | 0 | 0 | 0.551 |
| Charadriidae | *Vanellus indicus* | Red-wattled lapwing | I/P/C | LC | 0.950 | 0.798 | 0.898 | 1.042 | 0.139 | 0.093 | 3.920 |
| Charadriidae | *Vanellus leucurus* | White-tailed lapwing | I/P/C | LC | 0.230 | 0.238 | 0.330 | 0.298 | 0 | 0 | 1.096 |
| Charadriidae | *Vanellus malabaricus* | Yellow-wattled lapwing | I/P/C | LC | 0 | 0 | 0 | 0 | 0.007 | 0 | 0.007 |
| Ciconiidae | *Ciconia ciconia* | White stork | I/P/C | LC | 0.269 | 0.013 | 0.348 | 0 | 0 | 0 | 0.630 |
| Ciconiidae | *Ciconia episcopus* | Woolly-necked stork | I/P/C | NT | 0.050 | 0.016 | 0.046 | 0 | 0 | 0 | 0.111 |
| Gruidae | *Grus grus* | Common crane | O | LC | 0.0168 | 0.012 | 0 | 0 | 0 | 0 | 0.0288 |
| Gruidae | *Grus virgo* | Demoiselle crane | O | LC | 0.026 | 0.015 | 0 | 0 | 0 | 0 | 0.042 |
| Jacanidae | *Hydrophasianus chirurgus* | Pheasant-tail Jacana | I/P/C | LC | 0.139 | 0 | 0.349 | 0 | 0 | 0 | 0.489 |
| Laridae | *Sterna acuticaud* | Black-bellied tern | I/P | EN | 0 | 0 | 0 | 0 | 0.108 | 0.084 | 0.192 |
| Laridae | *Chroicocephalus ridibundus* | Black-headed gull | I/P/C | LC | 0.393 | 0 | 0.456 | 0 | 0.164 | 0.100 | 1.115 |
| Laridae | *Chroicocephalus brunnicephalus* | Brown-headed gull | I/P/C | LC | 0.208 | 0 | 0.429 | 0 | 0.101 | 0.047 | 0.785 |
| Laridae | *Sterna hirundo* | Common tern | I/P | LC | 0 | 0 | 0 | 0 | 0.011 | 0.078 | 0.089 |
| Laridae | *Larus argentatus* | Herring gull | I/P/C | LC | 0.299 | 0 | 0.529 | 0 | 0 | 0 | 0.828 |
| Laridae | *Sterna aurantia* | Indian river tern | I/P | VU | 0.233 | 0 | 0.335 | 0 | 0.085 | 0.131 | 0.783 |
| Laridae | *Ichthyaetus ichthyaetus* | Pallas's gull | I/P/C | LC | 0.115 | 0 | 0.346 | 0 | 0 | 0 | 0.461 |
| Laridae | *Chroicocephalus genei* | Slender-billed gull | I/P/C | LC | 0 | 0 | 0 | 0 | 0.127 | 0.006 | 0.133 |
| Motacillidae | *Motacilla alba* | White wagtail | I | LC | 0 | 0 | 0 | 0 | 0.156 | 0.133 | 0.293 |
| Pelecanidae | *Pelecanus crispus* | Dalmatian pelican | P | NT | 0.011 | 0 | 0.021 | 0 | 0 | 0 | 0.032 |
| Pelecanidae | *Pelecanus onocrotalus* | Great white Pelican | P | LC | 0.009 | 0 | 0.076 | 0 | 0 | 0 | 0.085 |
| Phalacrocoracidae | *Phalacrocorax carbo* | Great cormorant | I/P/C | LC | 1.380 | 1.069 | 1.388 | 1.518 | 0.094 | 0.083 | 5.531 |
| Phalacrocoracidae | *Microcarbo niger* | Little cormorant | I/P/C | LC | 1.446 | 1.093 | 1.341 | 1.557 | 0.197 | 0.114 | 5.747 |
| Phoenicopteridae | *Phoenicopterus roseus* | Greater flamingo | C | LC | 0 | 0 | 0 | 0.163 | 0 | 0 | 0.163 |
| Phoenicopteridae | *Phoeniconaias minor* | Lesser flamingo | C | NT | 0 | 0 | 0 | 0.163 | 0 | 0 | 0.163 |
| Podicipedidae | *Podiceps nigricollis* | Black-necked grebe | I/P | LC | 0.533 | 0.501 | 0.624 | 0.6574 | 0 | 0 | 2.316 |
| Podicipedidae | *Podiceps cristatus* | Great-crested grebe | I/P/C | LC | 0.224 | 0.233 | 0.379 | 0.300 | 0 | 0 | 1.136 |
| Podicipedidae | *Tachybaptus ruficollis* | Little grebe | I/P/C | LC | 0.832 | 0.775 | 0.858 | 0.954 | 0.189 | 0.167 | 3.774 |
| Rallidae | *Gallinula chloropus* | Common moorhen | O | LC | 0.274 | 0.288 | 0.349 | 0.347 | 0 | 0 | 1.258 |
| Rallidae | *Fulica atra* | Eurasian coot | O | LC | 0 | 0 | 0 | 0.178 | 0.152 | 0.183 | 0.513 |
| Rallidae | *Porzana parva* | Little crake | I | LC | 0 | 0 | 0 | 0 | 0.011 | 0.003 | 0.013 |
| Rallidae | *Porphyrio porphyrio* | Purple swamphen | O | LC | 0 | 0 | 0 | 0 | 0.067 | 0 | 0.067 |
| Rallidae | *Gallicrex cinerea* | Watercock | O | LC | 0 | 0 | 0 | 0 | 0.0279 | 0 | 0.0279 |
| Rallidae | *Amaurornis phoenicurus* | White-breasted waterhen | O | LC | 0.242 | 0 | 0.433 | 0 | 0.102 | 0.104 | 0.881 |
| Recurvirostridae | *Recurvirostra* | Avocet | I/C | LC | 0.273 | 0 | 0.620 | 0 | 0 | 0 | 0.893 |
| Recurvirostridae | *Himantopus himantopus* | Black-winged stilt | I/P | LC | 0.182 | 0 | 0.497 | 0 | 0.137 | 0.131 | 0.948 |
| Scolopacidae | *Tringa nebularia* | Common green shank | I/P | LC | 0.186 | 0.164 | 0.336 | 0.286 | 0 | 0 | 0.972 |
| Scolopacidae | *Tringa totanus* | Common red shank | I/P | VU | 0.433 | 0.368 | 0.565 | 0.558 | 0 | 0 | 1.924 |
| Scolopacidae | *Tadorna tadorna* | Common sandpiper | I/P | LC | 0.242 | 0.183 | 0.345 | 0.312 | 0.071 | 0.156 | 1.309 |
| Scolopacidae | *Actitis hypoleucos* | Eurasian wigeon | O | LC | 0.948 | 0.758 | 0.902 | 1.053 | 0.319 | 0.168 | 4.148 |
| Scolopacidae | *Gallinago media* | Greater painted snipe | I/P | LC | 0 | 0 | 0 | 0 | 0.062 | 0 | 0.062 |
| Scolpacidae | *Limosa limosa* | Black-tailed Godwit | I/P | NT | 0 | 0 | 0 | 0 | 0.157 | 0.171 | 0.328 |
| Threskiornithidae | *Plegadis falcinellus* | Glossy ibis | I/P/C | LC | 0 | 0 | 0 | 0 | 0.085 | 0 | 0.085 |

[Note; Foraging Guilds; C = Carnivore, I = Insectivore, I/C = Insectivore/Carnivore, I/P = Insectivore/Piscivore, I/P/C = Insectivore/Piscivore/Carnivore, O = Omnivore, and P = Piscivore. IUCN Conservation status; EN = Endangered, LC = Least Concern, NT = Nearly Threatened, and VU = Vulnerable]

**Appendix 3: APPROPRIATE MANAGEMENT PLAN FOR WETLAND ECOSYSTEM**

Wetland management plans identify the priority areas for enhancing bird populations and improving habitats. It includes the general background, potential threats, biophysical and social environmental issues of the targeted wetland ecosystems.

*General Background*

Pakistan is primarily an arid and semi-arid country. The country is blessed with a wide range of landscapes, such as coastal areas, deserts, semiarid regions, alluvial plains, agriculture fields, forests, salt ranges, mountains, valleys, rangelands, alpine pastures, glaciers, etc. Ramsar International defines wetlands as “natural or artificial areas of marsh, fens, peatland or water, with or without water, flowing or static, fresh, brackish, or salt water, including areas of marine water that are less than six meters deep at low tide”.

Across the country, there are more than 225 wetlands, which cover 15.0% of the total land area. There are a variety of wetlands in terms of size, floristic structure, and geographical location. The majority of wetlands are permanent, while a few are seasonal. In Pakistan, 20 wetland areas have been designated as Ramsar Sites (Globally Importance). Wetland areas are biodiversity hotspots for migratory waterfowl and waders and are important habitats for endangered bird species. As they serve as kidneys of the earth (improve water quality), habitats for wildlife, and a source of livelihood (fish), they are crucial to the survival of both humans and wildlife. They are also a source of food for the urban and rural population.

There is a lack of scientific data on various aspects of wetlands. In order to prepare an appropriate wetland management plan, it is crucial to improve monitoring activities in order to make informed decisions.

***Management Activities***

***Protection of Sensitive Areas*:** To enhance the population of threatened wildlife species, nesting and chick rearing sites, wintering areas, spawning grounds, and foraging grounds should be protected.

***Installation of Signboards*:** It is imperative to install signs that indicate the ecological status of the targeted species and their conservation requirements, especially in the sensitive areas which have been mentioned above.

***Control of Illegal Activities*:** A wide variety of illegal activities are detrimental to wildlife species and their habitats, such as hunting, fishing, industrial effluent, domestic sewage, agriculture runoff, and any other form of harvesting. To conserve and protect threatened species and increase their population, all illegal activities should be prohibited. Offenders who violate the rules should be punished severely, including fines and imprisonment.

***Control of Alien Species*:** To maintain ecological integrity, alien or invasive species should be strictly prohibited. In order to reduce adverse effects on water quality and habitat, thick mats of aquatic vegetation should be removed.

***Conservation of Flora and Fauna of the Wetland Habitat*:** Wetlands are crucial to the survival of a wide variety of wildlife species. In order to protect the wide range of threatened species, the conservation of wetland habitat is of utmost importance. Ensure the maintenance of the wetland's function, its value, and its habitat for wildlife. Threatened and endangered species should be given priority. Restoration of degraded wetland habitats can be achieved through planting, increasing food resources, improving water quality, and reducing pollution. In order to enhance wetland productivity, it is important to identify the degraded and less productive areas.

***Establishment of Zones*:** It is necessary to develop management plans that match specific requirements according to the ecological characteristics and human activities in different places. The purpose of zoning is to clearly identify boundaries between lands for different management purposes. A wetland area can be divided into three distinct zones (i) transition or public access zone, (ii) buffer zone, and (iii) core or intact zone for proper conservation and management.

1. Core Zone: In this zone no activity will be conducted. In this zone, the area is left to nature. Unless a natural disaster occurs, no human activities will be carried out in this zone.
2. Buffer Zone: Activities related to conservation and environment safety will take place in the buffer zone. In order to reduce negative impacts on the core zone and to increase food resources and provide safe havens for waterbird species, this zone will be established. It covers shallow water and the edges of wetlands.
3. Transition or Human Access Zone: Subsequent to the buffer zone, this area promotes sustainable use. The public is allowed to engage in ecotourism within this zone.

***Regular Framework***

1. Local communities can be involved in ecotourism and management activities.
2. Any private lands within the core protected zone should be transferred to the government so that regulations can be imposed and observed properly.
3. To achieve sustainable use of wetland resources for conservation and wise use, the stakeholders, including those involved in ecotourism and controlled fishing and hunting, must first reach a general agreement. Another management issue is the difficulty in resolving and transferring the land tenure of privately owned lands within the wetlands.
4. A general agreement among the stakeholders such as farmers having land adjacent to wetland areas should be done, i.e., they reduce the use of pesticides and fertilizers through Integrated Pest Management (IPM) and promote organic agriculture.
5. Environmental impact assessments (EIAs) must be conducted for any development project within this zone to assess potential negative impacts on the wetland. In order to maintain the ecological balance of the wetland in the long run, indirect impacts from all proposed development projects should be analyzed.

***Construction of Infrastructure*:** Tourists who visit a particular wetland area should have access to basic facilities. A nature interpretation center, bird watching hides, walking paths, accommodation (chalet), toilets, litter bins, and parking lots are included. Watch towers will be used to survey wildlife and look for signs of illegal activity. The flora and fauna species in wetland habitat should be monitored on a weekly basis as part of a regular monitoring program. The results indicate whether wildlife populations are increasing or decreasing in wetland habitats. A nature interpretation center provides basic information about wetland areas, local cultures, flora and fauna to ecotourists who are interested in preserving and conserving wetlands areas. Furthermore, the Nature interpretation center will be used for research, training, and education. It is important to clearly identify the camping area where ecotourists can enjoy themselves, e.g. camping and walking is a popular activity for ecotourists.

***Data Collection on Various Aspects of Wetland Habitat*:** Incomplete scientific data exist on these wetlands. It is crucial to gather comprehensive scientific data for the efficient management of wetlands and effective conservation efforts.

*Microclimate (Temperature, Relative Humidity and Rainfall) Monitoring*: It is necessary to record temperature, relative humidity, and rainfall data on a monthly basis in order to determine how microclimate variables fluctuate. The parameters above have a significant impact on habitat use, foraging behavior, breeding season, as well as selection of nesting sites. Waterbirds choose habitats that satisfy their needs, i.e., where they can breed and raise chicks. In addition, it can provide protection against harsh weather conditions and predators. Data on microclimate variables will be collected by portable HOBO mini weather stations.

*Soil Properties Assessment*: Invertebrates thrive in the soil and are the staple diet of adult waterbirds and their chicks. As soil composition and structure play a key role in floristic characteristics. The soil physical and chemical properties will be examined through collecting the soil sample at heterogeneous location. The physical and chemical properties of soil in shallow waters and at wetland edges will be monitored regularly.

*Water Quality Monitoring*: To understand wetland ecology, it is crucial to examine the water quality of the particular wetland habitat at various locations regularly in order to determine whether aquatic flora and fauna can thrive in the water. Furthermore, it will show the concentration of gases, the total dissolve salts, pollutants, and sediments ratio of water. To determine the fluctuation in water quality, the parameters of water quality should be monitored regularly. It provides comprehensive information on wetland habitat from a physical and biological standpoint. The following parameters can be ascertained as given below in table one.

Table: Water quality parameters can be measure in wetland

| Arsenic | Mercury |
| --- | --- |
| Ammonia | Nitrate |
| An-ionic Detergents | Nitrite |
| Barium | Nickel |
| Biological Oxygen Demand (BOD) | Oil & Grease |
| Boron | pH |
| Cadmium | Phenolic compound |
| Chloride | Salinity |
| Chlorine | Selenium |
| Chromium hexavalent | Silver |
| Chemical Oxygen Demand (COD) | Sulphate |
| Conductivity | Sulphide |
| Copper | Temperature |
| Cyanide | Total Dissolved Solids (TDS) |
| Dissolved Oxygen (DO) | Total Suspended Solids (TSS) |
| Fluoride | Total Toxic Metals |
| Iron | Turbidity |
| Lead | Zinc |
| Manganese |  |

***Fauna Survey*:** Wetlands are highly productive communities and provide habitat and food resources to a wide range of species. They provide an ideal habitat for fish, amphibians, shellfish, insects, and fish because of their high nutritional value. A variety of fauna rely on wetlands for food, water, breeding, and protection.

*Large Mammal Survey:* It is imperative that large mammals be surveyed via line transects, spotlights, and direct sightings as well as indirect methods, including footprints, scats, and feeding signs.

*Small Mammal Survey*: Mist nets, Sherman traps, and snap traps should also be used to monitor small mammals in particular wetland areas, along with bait (a combination of different grains mixed with fragrant seeds). Food grains like wheat and rice can be used as food while peanut butter, coriander, oats, and onion are utilized for fragrance. The bait is highly effective in luring small mammals. It is mandatory to use freshly prepared bait every day when trapping.

***Bird Survey*:** Wetland birds are motile components of wetland habitat and often associated with wetland vegetation and concentrated where food resources are sufficient. A variety of methods can be used to monitor bird fauna, such as direct observation, point counts, line transects, point count line transects, and mist-netting.

***Fish Fauna Survey*:** Gillnets and hand casts can be used to survey fish fauna.

*Amphibian and Reptile Survey*: The amphibians and reptiles are among the most important vertebrates. The amphibians and reptiles should be surveyed by active search and pitfall trapping. As a result of the amphibian and reptile survey, information will be gathered about the food resources of wetlands, the food chain and the food web that exists in wetland habitats.

***Vegetation Survey*:** Vegetation is an essential component of wetland productivity and habitat suitability. Vegetation of wetlands can be determined by direct visual estimation, by using a quadrat method, or by using a circular plot method. The vegetation survey will provide information about habitat suitability and productivity for various wildlife fauna species**.**
